# Supplementary material for: Deletion of VPS50 protein in mouse brain impairs synaptic function and behavior
Source: PubMed Central journal article supplement (PMC11210182; doi:10.1186/s12915-024-01940-y), 2024-06-26

**A**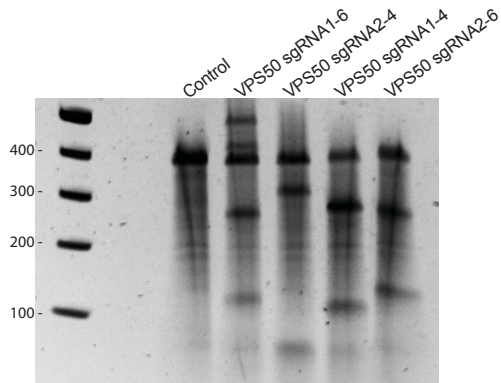**B****Control**

GGAAGGCTGACCCAGGCGGGCAGCTCCACGTGACGACTCACTATGGCTTCCCTGTGTTGTAGCCGGTGTCTGGTGGGATTATGTGATTGTTACTTCTCCGAGGCAGG  
 sgRNA6

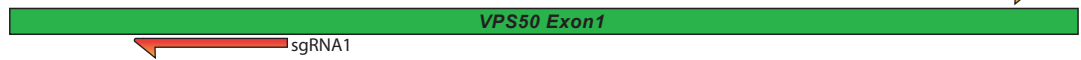**VPS50 EDITED**

GGAAGGCTGACCCAGGCGG-----GGGATTATGTGATTGTTACTTCTCCGAGGCAGG  
 GGAAGGCTGACCCAGGCGGGCAGCT-----TGTGATTGTTACTTCTCCGAGGCAGG  
 GGAAGGCTGACCCAGGCGG-----GTGATTGTTACTTCTCCGAGGCAGG  
 GGAAGGCTGACCCAGGCGGGC-----ATTATGTGATTGTTACTTCTCCGAGGCAGG  
 GGAAGGCTGACCCAGGCGGGCAGCT-----ATTATGTGATTGTTACTTCTCCGAGGCAGG  
 GGAAGGCTGACCCAGGC-----TGATTGTTACTTCTCCGAGGCAGG  
 GGAAGGCTGACCCAGGCGGGCAGCTCCACGT-----GTGGGATTATGTGATTGTTACTTCTCCGAGGCAGG  
 GGAAGGCTGACCCAGGCGGGCAGCTCCAC-----GTGGGATTATGTGATTGTTACTTCTCCGAGGCAGG  
 GGAAGGCTGACCCAGGCGGGCAGC-----TGTGATTGTTACTTCTCCGAGGCAGG  
 GGAAGGCTGACCCAGGCGGGCAGCTCCACG-----GGGATTATGTGATTGTTACTTCTCCGAGGCAGG  
 GGAAGGCTGACCCAGGC-----TGATTGTTACTTCTCCGAGGCAGG  
 GGAAGGCTGACCCAGGCGGGCAGCT-----ATTATGTGATTGTTACTTCTCCGAGGCAGG  
 GGAAGGCTGACCCAGGCGGGCAGCT-----ATTATGTGATTGTTACTTCTCCGAGGCAGG  
 GGAAGGCTGACCCAGGCGGGCA-----TATGTGATTGTTACTTCTCCGAGGCAGG  
 GGAAGGCTGACCCAGGCG-----GTGATTGTTACTTCTCCGAGGCAGG  
 GGAAGGCTGACCCAGGCGG-----GTGATTGTTACTTCTCCGAGGCAGG

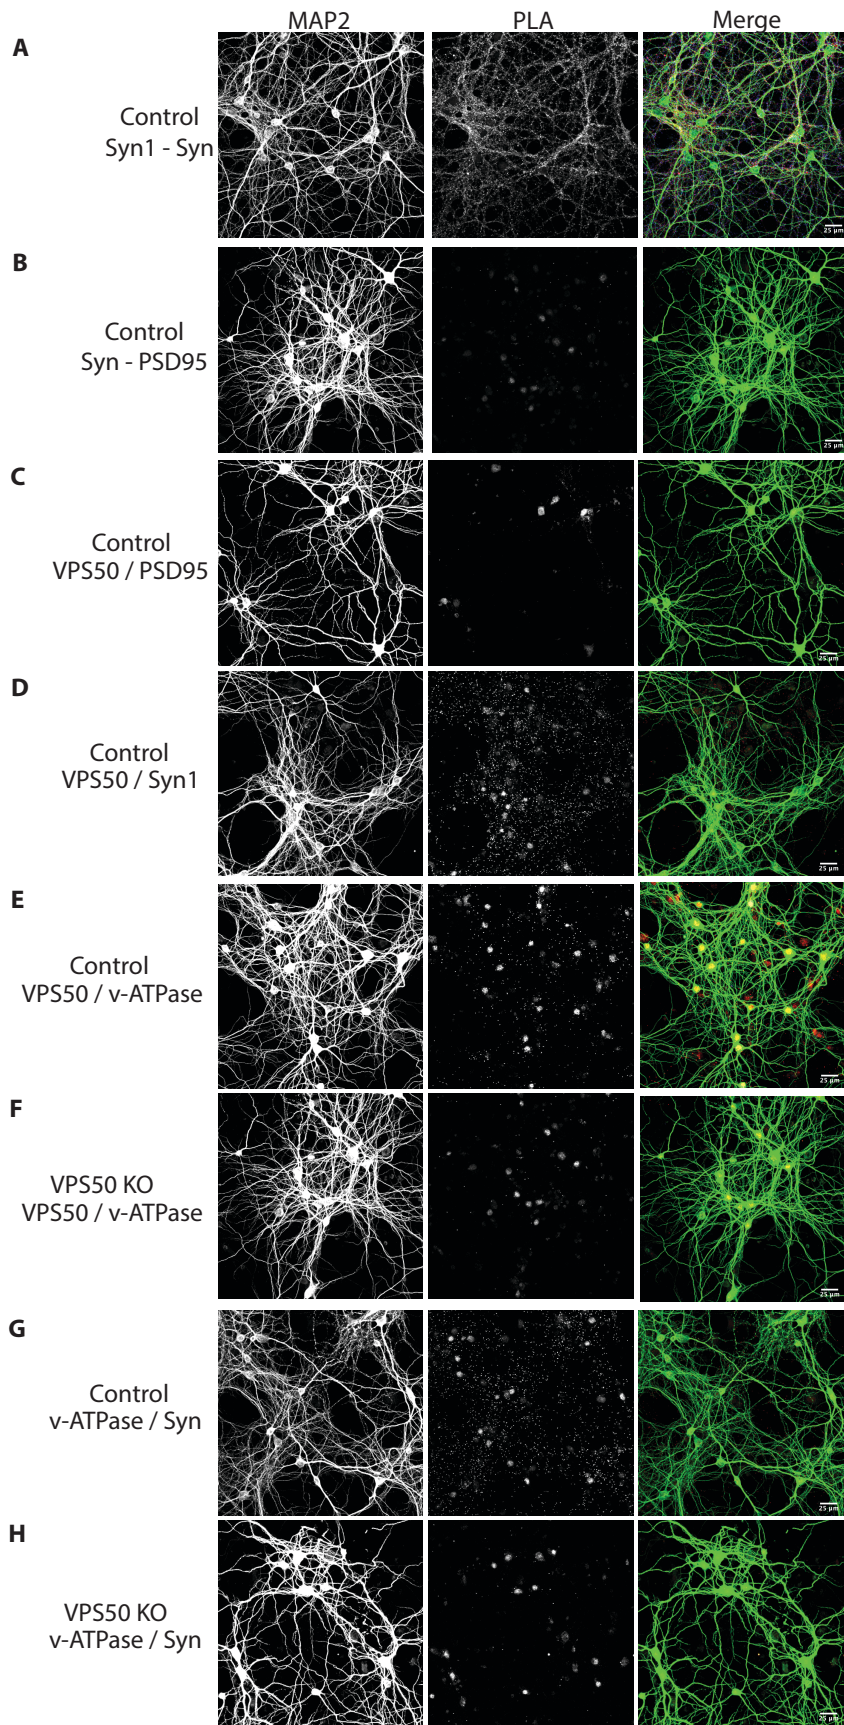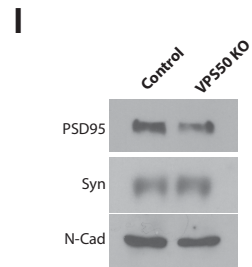

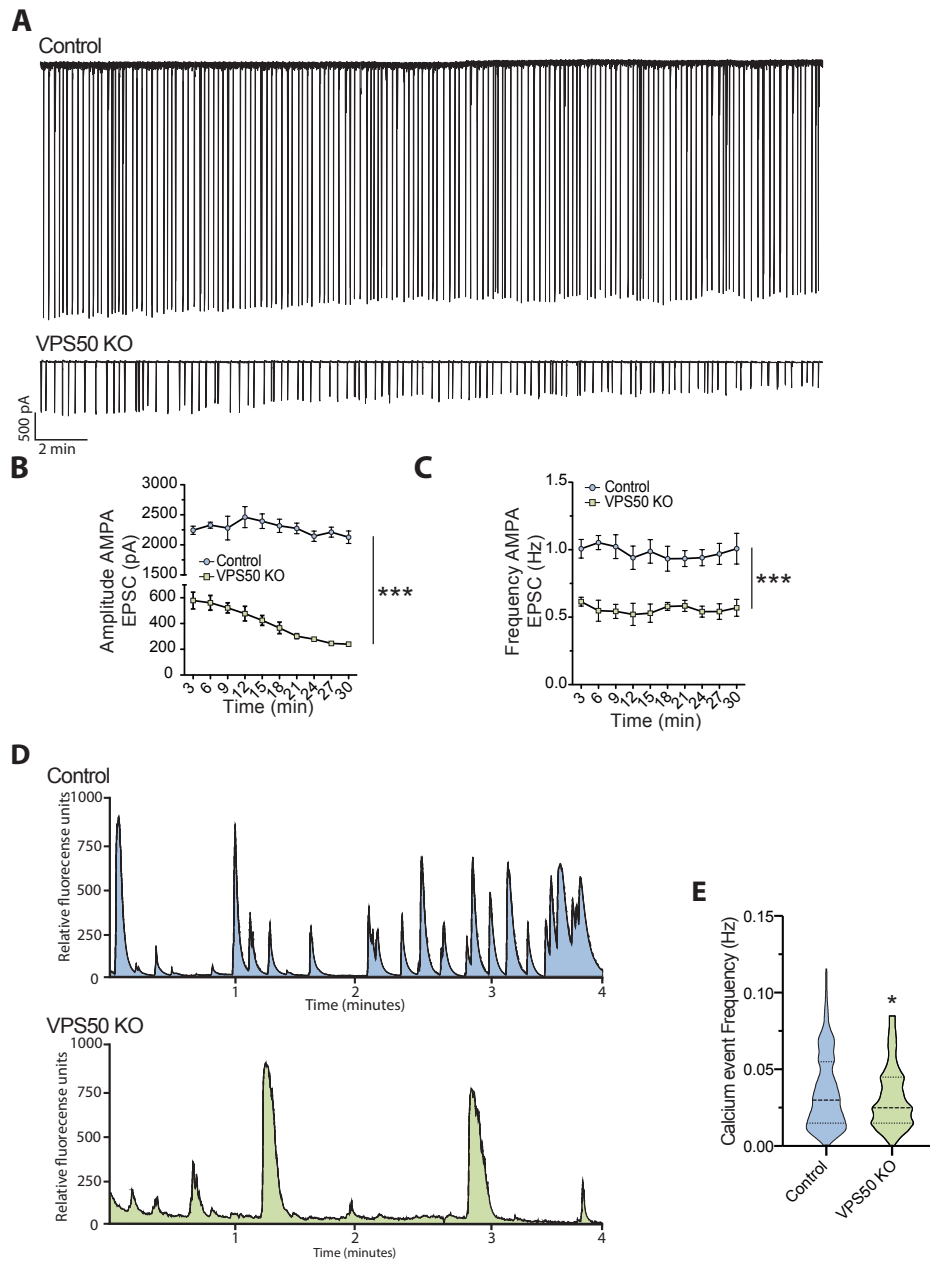

Ahumada-Marchant et al., Fig. S3.

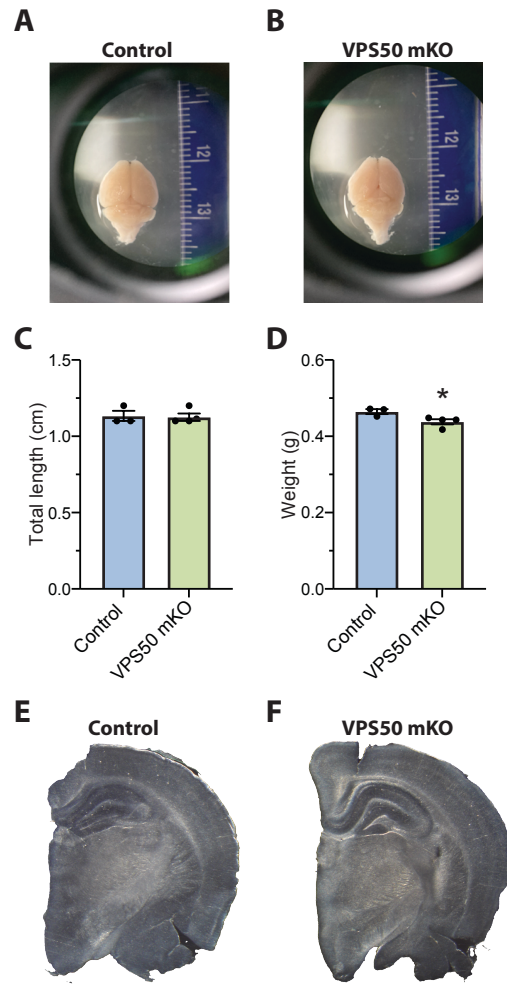

Supplement: 12915_2024_1940_MOESM1_ESM.pdf [file 12915_2024_1940_MOESM1_ESM.pdf]
