# Supplementary material for: Deletion of VPS50 protein in mouse brain impairs synaptic function and behavior
Source: PubMed Central journal article supplement (PMC11210182; doi:10.1186/s12915-024-01940-y), 2024-06-26
Supplement: 12915_2024_1940_MOESM2_ESM.pdf [file 12915_2024_1940_MOESM2_ESM.pdf]

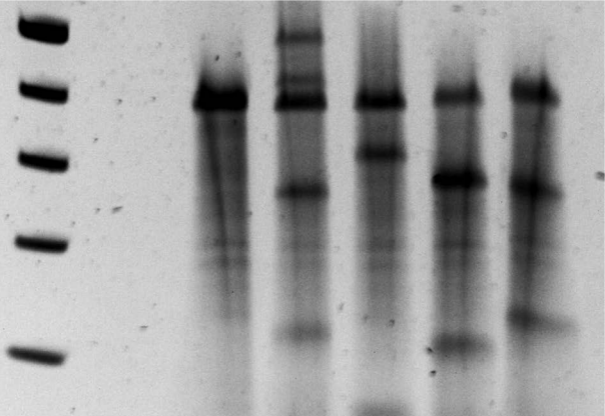

Figure 1A

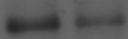

Figure 1C VPS50

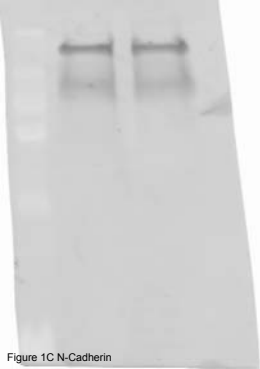

Figure 1C N-Cadherin

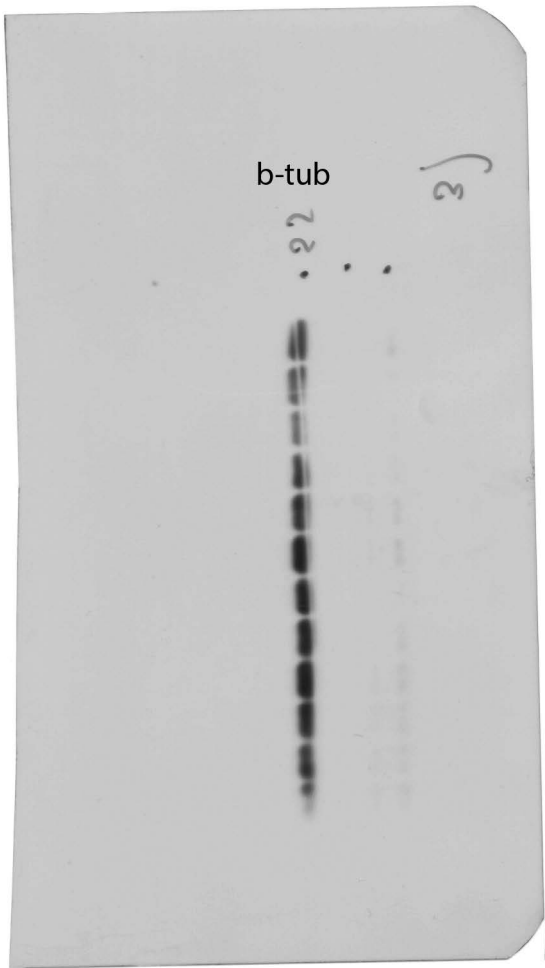

Figure 4D B-Tub



ΔPSD95

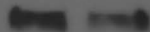

WT PSD95

FIG S2I PSD95



FIG S2I Syn

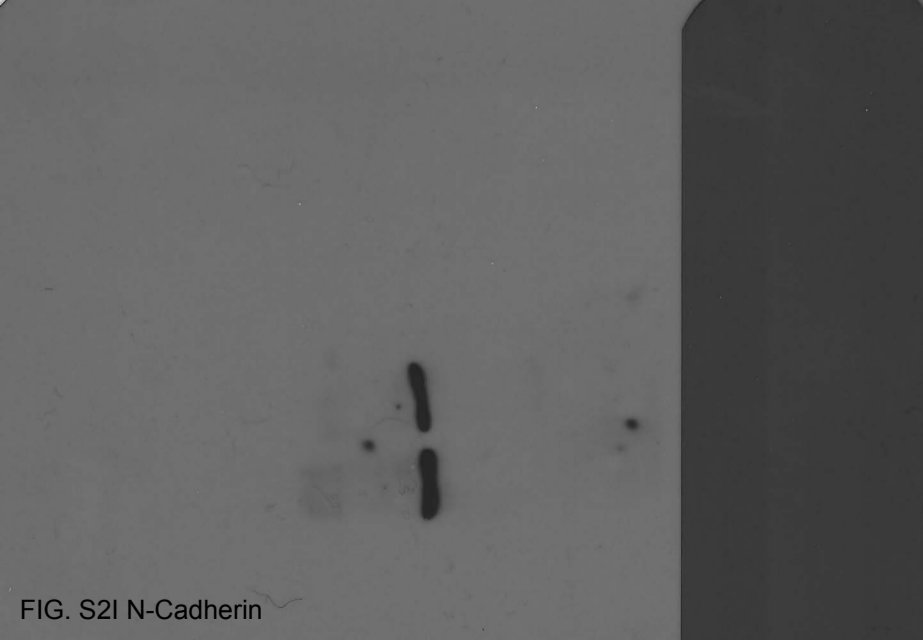

FIG. S2I N-Cadherin
